# Supplementary material for: Loss of ncm5 and mcm5 wobble uridine side chains results in an altered metabolic profile
Source: PubMed Central journal article supplement (PMC5037161; doi:10.1007/s11306-016-1120-8), 2016-09-27
Supplement: 11306_2016_1120_MOESM1_ESM.pdf [file 11306_2016_1120_MOESM1_ESM.pdf]

## Loss of *ncm*<sup>5</sup> and *mcm*<sup>5</sup> wobble uridine side chains results in an altered metabolic profile

Tony Karlsborn<sup>1</sup>, A K M Firoj Mahmud<sup>1†</sup>, Hasan Tükenmez<sup>1†</sup> and Anders S. Byström<sup>1,\*</sup>

1) Department of Molecular Biology, Umeå University, 901 87 Umeå, Sweden

† These authors contributed equally

\* Corresponding author, Phone (+46)-90-785 67 64; Fax (+46)-90-77 26 30

E-mail address, [Anders.Bystrom@molbiol.umu.se](mailto:Anders.Bystrom@molbiol.umu.se)

Metabolomics-Springer

### Online Resource 1. Strains and plasmids used in this study.

| Strain              | Genotype                                       | Source                     |
|---------------------|------------------------------------------------|----------------------------|
| UMY4238             | MAT a <i>leu2Δ0</i>                            | This study                 |
| UMY4239             | MAT a <i>leu2Δ0 elp3::kanMX4</i>               | This study                 |
| UMY2016/<br>UMY2026 | MAT a/α <i>ura3Δ0/URA3 leu2Δ0/LEU2</i>         | This study                 |
| Plasmid             | Genotype                                       | Source                     |
| ABY1653             | <i>pRS425-tRNAGlnUUG-tRNALysUUU-tRNAGluUUC</i> | (Lu et al. 2005)           |
| ABY525              | <i>pRS425</i>                                  | (Christianson et al. 1992) |
| ABY1514             | <i>pRS315-ELP3</i>                             | (Huang et al. 2005)        |
| ABY348              | <i>pRS315</i>                                  | (Sikorski and Hieter 1989) |
