# Supplementary material for: Loss of ncm5 and mcm5 wobble uridine side chains results in an altered metabolic profile
Source: PubMed Central journal article supplement (PMC5037161; doi:10.1007/s11306-016-1120-8), 2016-09-27
Supplement: 11306_2016_1120_MOESM2_ESM.pdf [file 11306_2016_1120_MOESM2_ESM.pdf]

## Loss of *ncm*<sup>5</sup> and *mcm*<sup>5</sup> wobble uridine side chains results in an altered metabolic profile

Tony Karlsborn<sup>1</sup>, A K M Firoj Mahmud<sup>1†</sup>, Hasan Tükenmez<sup>1†</sup> and Anders S. Byström<sup>1,\*</sup>

1) Department of Molecular Biology, Umeå University, 901 87 Umeå, Sweden

† These authors contributed equally

\* Corresponding author, Phone (+46)-90-785 67 64; Fax (+46)-90-77 26 30

E-mail address, [Anders.Bystrom@molbiol.umu.se](mailto:Anders.Bystrom@molbiol.umu.se)

Metabolomics-Springer

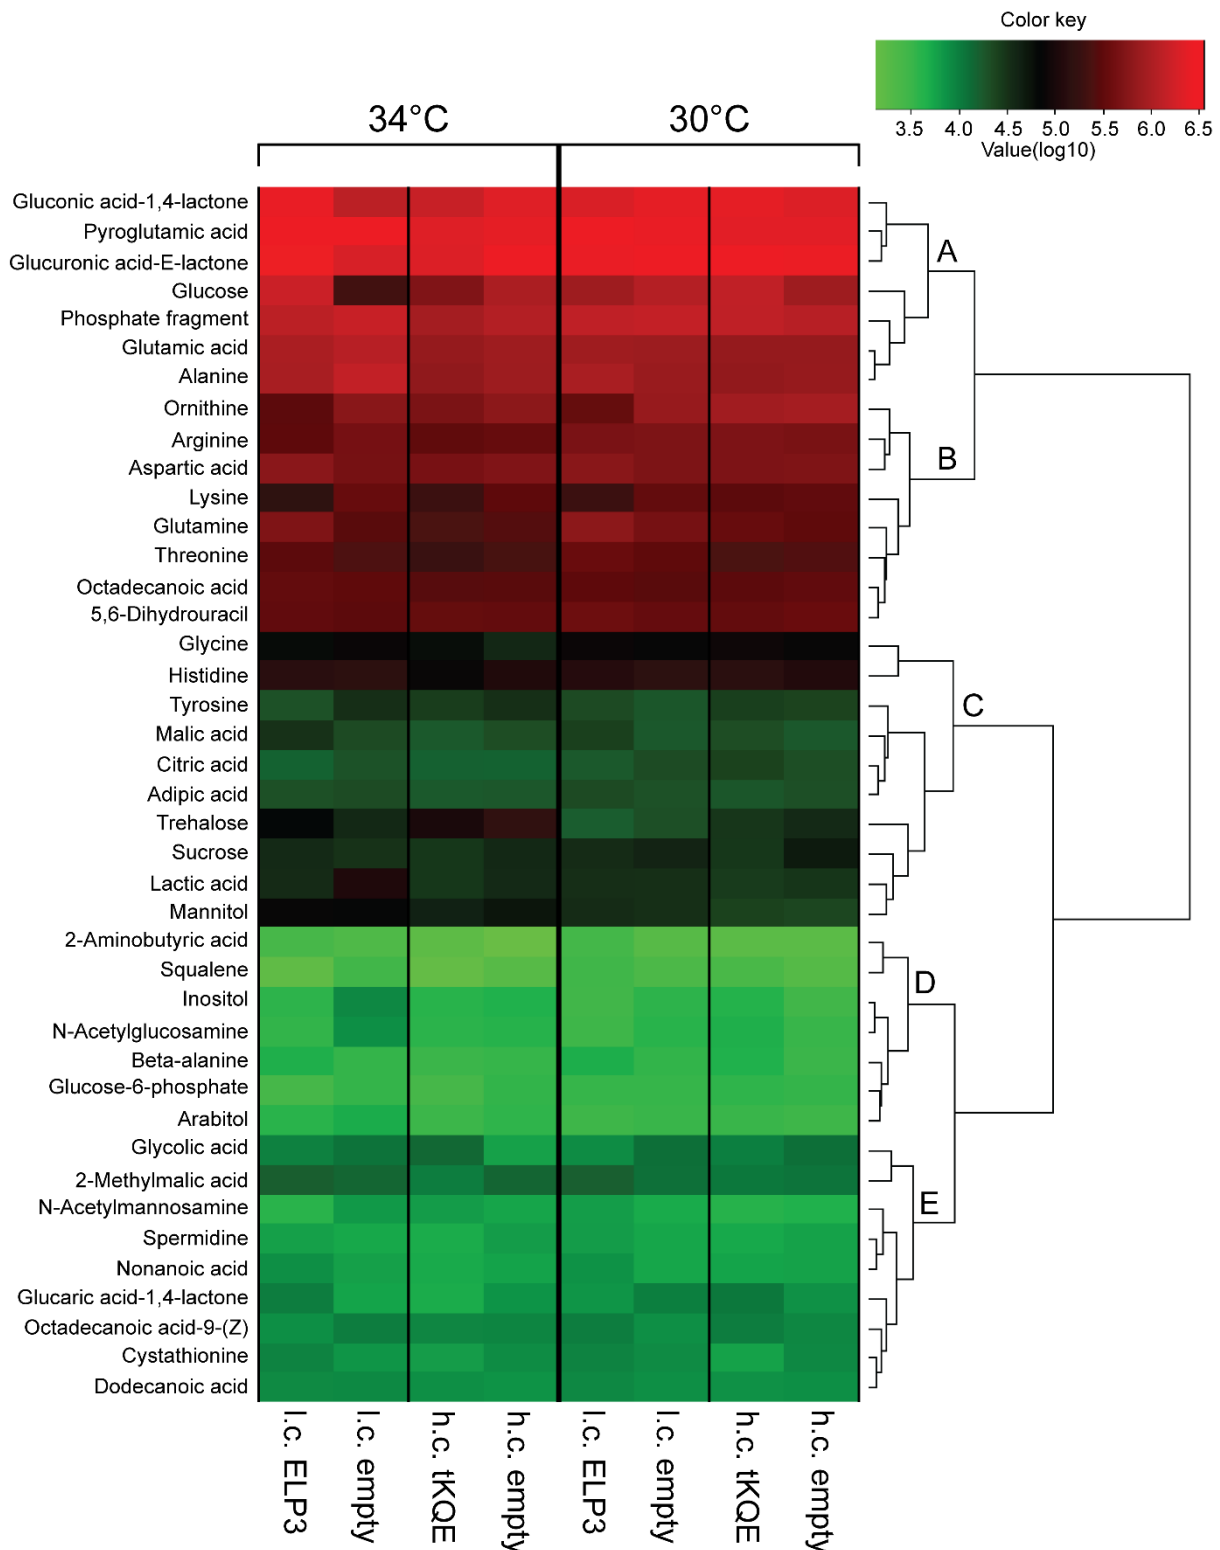

**Online Resource 2. Hierarchical clustering of metabolites from strains containing indicated plasmids.** The UMY4239 *elp3Δ* strains contained either: an empty pRS315 low copy vector (l.c. empty); a pRS315 vector carrying the wild-type *ELP3* gene (l.c. ELP3); an empty pRS425 high copy vector (h.c. empty); or a pRS425 high copy vector carrying the tRNA genes *tK(UUU)*, *tQ(UUG)* and *tE(UUC)* (h.c. tKQE). These yeast strains were grown logarithmically

to ~0.5 OD<sub>600</sub> at 30°C or 34°C and harvested. Metabolites were extracted and then quantified using GC-TOF-MS. Hierarchical clusters are labeled from A to E based on metabolite abundance. Red signifies metabolite enrichment and green signifies metabolite reduction.
