# Supplementary material for: Loss of ncm5 and mcm5 wobble uridine side chains results in an altered metabolic profile
Source: PubMed Central journal article supplement (PMC5037161; doi:10.1007/s11306-016-1120-8), 2016-09-27
Supplement: 11306_2016_1120_MOESM4_ESM.pdf [file 11306_2016_1120_MOESM4_ESM.pdf]

## Loss of *ncm*<sup>5</sup> and *mcm*<sup>5</sup> wobble uridine side chains results in an altered metabolic profile

Tony Karlsborn<sup>1</sup>, A K M Firoj Mahmud<sup>1†</sup>, Hasan Tükenmez<sup>1†</sup> and Anders S. Byström<sup>1,\*</sup>

1) Department of Molecular Biology, Umeå University, 901 87 Umeå, Sweden

† These authors contributed equally

\* Corresponding author, Phone (+46)-90-785 67 64; Fax (+46)-90-77 26 30

E-mail address, [Anders.Bystrom@molbiol.umu.se](mailto:Anders.Bystrom@molbiol.umu.se)

Metabolomics-Springer

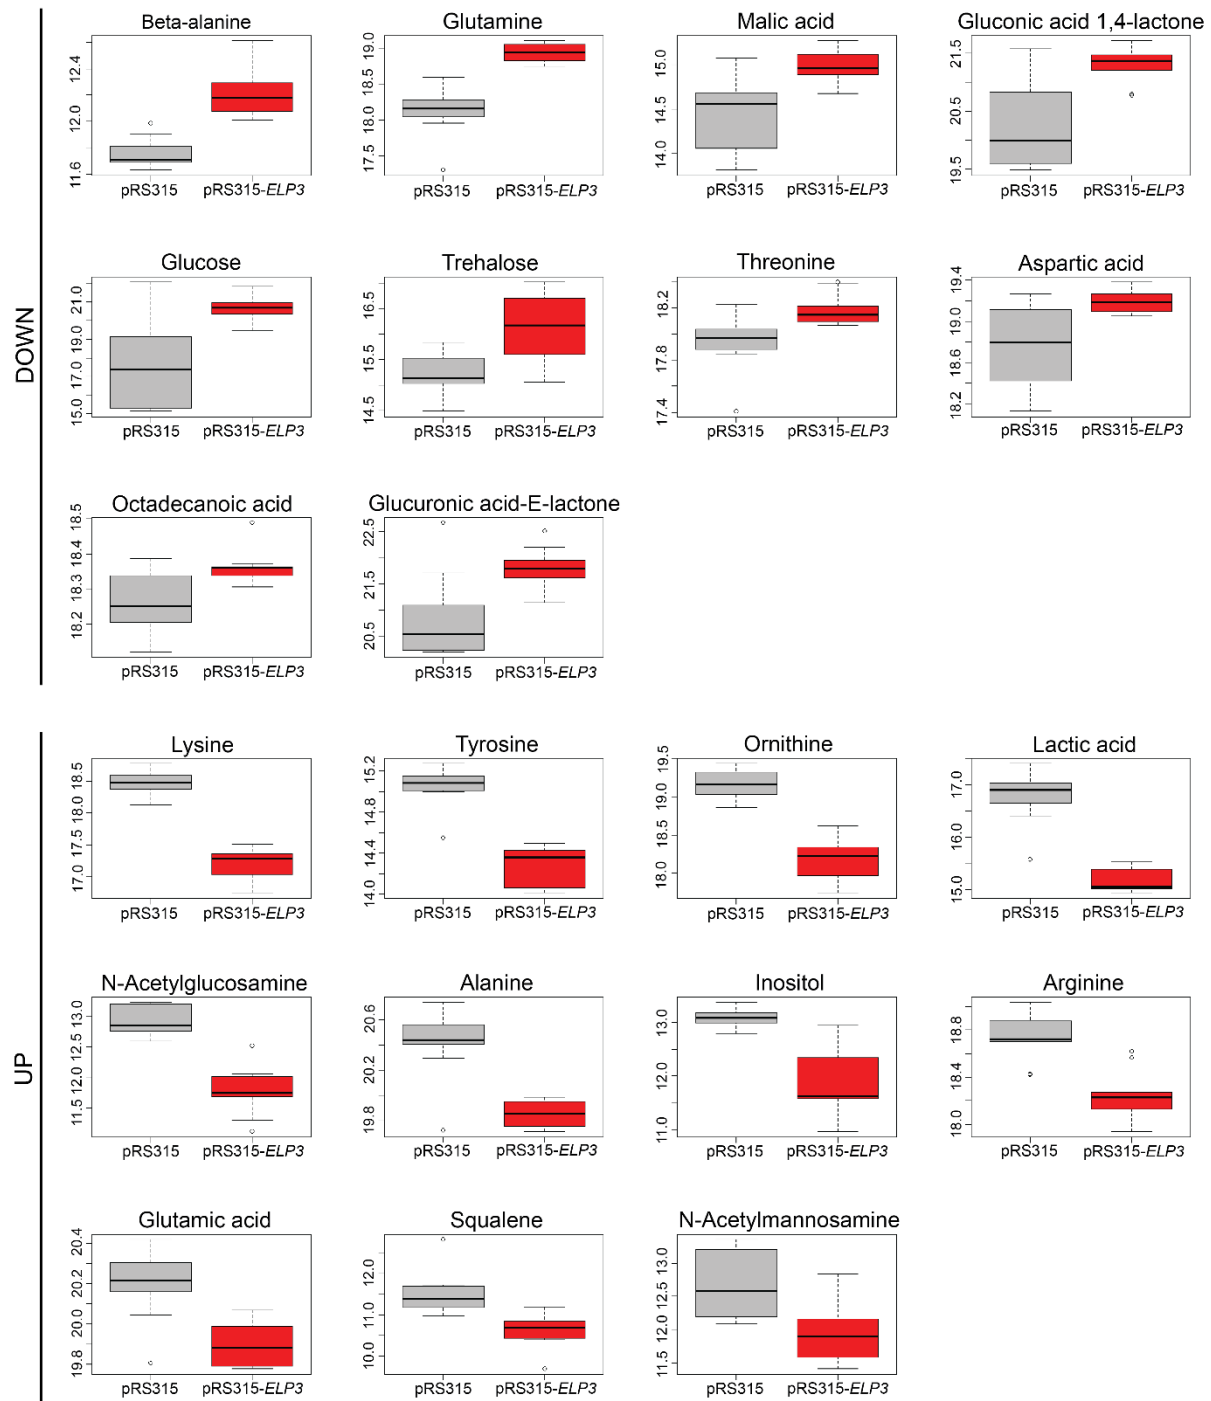

**Online Resource 4. Levels of identified metabolites with a VIP score above 1 in the PLS-DA comparing the *elp3Δ*-l.c.-empty and *elp3Δ*-l.c.-ELP3 strains grown at 34°C.** The *elp3Δ* strain containing either an empty low copy pRS315 vector or a pRS315 vector carrying the wild type *ELP3* gene was grown logarithmically to an OD<sub>600</sub> of ~0.5 and harvested (see material and methods). Metabolites were extracted and then quantified using GC-TOF-MS. Values obtained were normalized and log<sub>2</sub>-transformed, and metabolic alterations were analyzed using PLS-DA. Metabolites shown have a VIP score >1. Metabolites were classified as either increasing (UP) or decreasing (DOWN) in the *elp3Δ* strain containing an empty low copy pRS315 vector when compared to the *elp3Δ* strain carrying the wild-type *ELP3* gene. Boxplots were generated using R software with the Y-axis displaying the relative intensity in log<sub>2</sub>-scale.
