# Supplementary material for: Loss of ncm5 and mcm5 wobble uridine side chains results in an altered metabolic profile
Source: PubMed Central journal article supplement (PMC5037161; doi:10.1007/s11306-016-1120-8), 2016-09-27
Supplement: 11306_2016_1120_MOESM7_ESM.pdf [file 11306_2016_1120_MOESM7_ESM.pdf]

## Loss of *ncm*<sup>5</sup> and *mcm*<sup>5</sup> wobble uridine side chains results in an altered metabolic profile

Tony Karlsborn<sup>1</sup>, A K M Firoj Mahmud<sup>1†</sup>, Hasan Tükenmez<sup>1†</sup> and Anders S. Byström<sup>1,\*</sup>

1) Department of Molecular Biology, Umeå University, 901 87 Umeå, Sweden

† These authors contributed equally

\* Corresponding author, Phone (+46)-90-785 67 64; Fax (+46)-90-77 26 30

E-mail address, [Anders.Bystrom@molbiol.umu.se](mailto:Anders.Bystrom@molbiol.umu.se)

Metabolomics-Springer

### Online Resource 7. Summary of the PLS-DA models used in the study.

| Culturing Temp. | Strain                  | Obs. | Tot. Obs. | Comp. | Eigenv. | R2Y   | Q2    | CV-ANOVA         |
|-----------------|-------------------------|------|-----------|-------|---------|-------|-------|------------------|
| 30°C            | <i>elp3Δ-l.c.-empty</i> | 9    | 18        | 3     | 5.18    | 0.87  | 0.8   | <b>3,38E-05</b>  |
| 30°C            | <i>elp3Δ-l.c.-ELP3</i>  | 9    |           |       |         |       |       |                  |
| 30°C            | <i>elp3Δ-h.c.-empty</i> | 9    | 18        | 1     | 2.48    | 0.803 | 0.35  | <b>0,0394747</b> |
| 30°C            | <i>elp3Δ-h.c.-tKQE</i>  | 9    |           |       |         |       |       |                  |
| 30°C            | <i>elp3Δ-h.c.-empty</i> | 9    | 18        | 3     | 6.22    | 0.765 | 0.643 | <b>2,26E-05</b>  |
| 30°C            | <b>WT-h.c.-empty</b>    | 9    |           |       |         |       |       |                  |
| 34°C            | <i>elp3Δ-l.c.-empty</i> | 9    | 18        | 2     | 5.82    | 0.951 | 0.903 | <b>2,67E-07</b>  |
| 34°C            | <i>elp3Δ-l.c.-ELP3</i>  | 9    |           |       |         |       |       |                  |
| 34°C            | <i>elp3Δ-h.c.-empty</i> | 9    | 17*       | 4     | 7.39    | 0.498 | 0.383 | <b>0,0479456</b> |
| 34°C            | <i>elp3Δ-h.c.-tKQE</i>  | 8*   |           |       |         |       |       |                  |

**Obs.** Indicates the number of observations from each strain used in the PLS-DA model (three biological replicates with three technical replicates for each biological replicate).

\* One technical replicate was defined as an outlier in the PLS-DA model and was therefore excluded.

**Tot. Obs.** Indicates the total number of observations used in the PLS-DA model.

**Comp.** The number of components in the PLS-DA model.

**Eigenv.** Eigenvalue describes the length of the vector making up the first component of the PLS-DA model.

**R2Y** Fraction of Y variation modeled in the first component of the PLS-DA model.

**Q2** Cross-validation of the R2-value for the first component in the PLS-DA model.

**CV-ANOVA** P-value from the CV-ANOVA significance test of the PLS-DA model. The 95% statistical significance was set to  $P < 0.05$  and the 99.9% statistical significance was set to  $P < 0.001$ .
